# Supplementary material for: CelFiE-ISH: a probabilistic model for multi-cell type deconvolution from single-molecule DNA methylation haplotypes
Source: PubMed Central journal article supplement (PMC11163775; doi:10.1186/s13059-024-03275-x), 2024-06-10
Supplement: 13059_2024_3275_MOESM4_ESM.pdf [file 13059_2024_3275_MOESM4_ESM.pdf]

# The CelFiE-ISH Model

## 1 Reference Atlas

The reference atlas consists of one matrix  $\beta_{t,m}$ , with the probability of methylation for cell type  $t$  at position  $m$ . In this model we do not re-estimate the atlas at each iteration.

## 2 Mixture

The mixture is one matrix  $X$ , with dimensions  $C$  reads over  $M$  CpG sites.

## 3 Likelihood

The observed data likelihood is:

$$\begin{aligned} P(x|\alpha, \beta) &= \prod_c \sum_t \alpha_t P(x_c|\beta_t) = \\ & \prod_c \sum_t \alpha_t \prod_m \beta_{t,m}^{x_{c,m}} (1 - \beta_{t,m})^{1-x_{c,m}} \end{aligned} \quad (1)$$

The observed data log-likelihood is:

$$\begin{aligned} \log P(x|\alpha, \beta) &= \sum_c \log \left( \sum_t \alpha_t \prod_m \beta_{t,m}^{x_{c,m}} (1 - \beta_{t,m})^{1-x_{c,m}} \right) = \\ & \sum_c \log \text{sumexp} \left\{ \log \left( \alpha_t \prod_m \beta_{t,m}^{x_{c,m}} (1 - \beta_{t,m})^{1-x_{c,m}} \right) \right\} = \\ & \sum_c \log \text{sumexp} \left\{ \log(\alpha_t) + \sum_m x_{c,m} \log(\beta_{t,m}) + (1 - x_{c,m}) \log(1 - \beta_{t,m}) \right\} \end{aligned} \quad (2)$$

The complete data likelihood is:

$$P(x, z|\alpha, \beta) = P(x|z, \beta) P(z|\alpha) \quad (3)$$

Where the first term is

$$\begin{aligned}
\log(P(x|z, \beta)) &= \sum_{t,c,m} \log \left[ \beta_{t,m}^{z_{t,c} x_{c,m}} (1 - \beta_{t,m})^{z_{t,c}(1-x_{c,m})} \right] \\
&= \sum_{t,c,m} z_{t,c} [x_{c,m} \log(\beta_{t,m}) + (1 - x_{c,m}) \log(1 - \beta_{t,m})]
\end{aligned}
\tag{4}$$

and the second term is

$$\log(P(z|\alpha)) = \sum_{t,c} \log(\alpha_t^{z_{t,c}}) = \sum_{t,c} z_{t,c} \log(\alpha_t)
\tag{5}$$

## 4 Q function

As  $z$  is unknown, we define  $\tilde{p}$  as the probability of  $z$ :

$$P(z_{t,c} = 1 | \alpha, \beta) =: \tilde{p}_{t,c}$$

Q is the expected value of the log-likelihood function.

At iteration  $i$ , the Q-function is:

$$\begin{aligned}
Q_i &= \mathbb{E}_{z|x, \alpha^i, \beta} (\log P(x, z | \alpha, \beta)) = \\
&\sum_{t,c} \tilde{p}_{t,c}^i \sum_m [x_{c,m} \log(\beta_{t,m}) + (1 - x_{c,m}) \log(1 - \beta_{t,m})] + \\
&\sum_{t,c} \tilde{p}_{t,c}^i \log(\alpha_t)
\end{aligned}
\tag{6}$$

## 5 E-step

In the E-step we estimate the latent variable  $z$  and use it to define the Q function.

$$P(z_{t,c} = 1 | x_c, \beta, \alpha) = \frac{\alpha_t \prod_m \beta_{t,m}^{x_{m,c}} (1 - \beta_{t,m})^{1-x_{m,c}}}{\sum_k \alpha_k \prod_m \beta_{k,m}^{x_{m,c}} (1 - \beta_{k,m})^{1-x_{m,c}}} =: \tilde{p}_{t,c} \quad (7)$$

## 6 M-step

In the M-step we maximize the Q function, holding the estimate for the latent variable  $z$  constant and maximizing  $\alpha$ .

$$\alpha_t = \frac{\sum_c \tilde{p}_{t,c}}{C}$$

## The CelFiE-ISH ReAtlas Model

## 7 Reference Atlas

The reference atlas consists of two matrices,  $Y_{t,m}$  and  $D_{t,m}^Y$ , with the number of methylated and total reads for cell type  $t$  at position  $m$  respectively. We assume  $Y_{t,m}$  is drawn from a Binomial distribution with  $\beta_{t,m}$  being the true methylation probability and  $D_{t,m}^Y$  being the number of trials. We re-estimate the atlas at each iteration.

## 8 Mixture

The mixture is one matrix  $X$ , with dimensions  $C$  reads over  $M$  CpG sites.

## 9 Likelihood

The observed data likelihood is:

$$P(x|\alpha, \beta) = P(x|\alpha, \beta)P(Y|\beta) = \prod_c \sum_t \alpha_t P(x_c|\beta_t)P(Y|\beta) = \prod_c \left\{ \sum_t \alpha_t \prod_m \beta_{t,m}^{x_{c,m}} (1 - \beta_{t,m})^{1-x_{c,m}} \right\} \prod_t \prod_m \left\{ \beta_{t,m}^{Y_{t,m}} (1 - \beta_{t,m})^{D_{t,m}^Y - Y_{t,m}} \right\} \quad (8)$$

The observed data log-likelihood is:

$$\begin{aligned}
\log P(x|\alpha, \beta) &= \sum_c \log \left( \sum_t \alpha_t \prod_m \beta_{t,m}^{x_{c,m}} (1 - \beta_{t,m})^{1-x_{c,m}} \right) + \log(P(Y|\beta)) = \\
&= \sum_c \log \text{sumexp} \left\{ \log \left( \alpha_t \prod_m \beta_{t,m}^{x_{c,m}} (1 - \beta_{t,m})^{1-x_{c,m}} \right) \right\} + \log(P(Y|\beta)) = \\
\sum_c \log \text{sumexp} \left\{ \log(\alpha_t) + \sum_m x_{c,m} \log(\beta_{t,m}) + (1 - x_{c,m}) \log(1 - \beta_{t,m}) \right\} + \log(P(Y|\beta)) &= \\
\sum_c \log \text{sumexp} \left\{ \log(\alpha_t) + \sum_m x_{c,m} \log(\beta_{t,m}) + (1 - x_{c,m}) \log(1 - \beta_{t,m}) \right\} + & \\
\sum_{t,m} \left\{ Y_{t,m} \log \beta_{t,m} + (D^{Y_{t,m}} - Y_{t,m}) \log(1 - \beta_{t,m}) \right\} & \\
(9) &
\end{aligned}$$

The complete data likelihood is:

$$P(x, z, Y|\alpha, \beta) = P(x|z, \beta)P(z|\alpha)P(Y|\beta)$$

(10)

The first term is

$$\begin{aligned}
\log(P(x|z, \beta)) &= \sum_{t,c,m} \log \left[ \beta_{t,m}^{z_{t,c} x_{c,m}} (1 - \beta_{t,m})^{z_{t,c} (1-x_{c,m})} \right] \\
&= \sum_{t,c,m} z_{t,c} [x_{c,m} \log(\beta_{t,m}) + (1 - x_{c,m}) \log(1 - \beta_{t,m})] \\
(11) &
\end{aligned}$$

The second term is

$$\log(P(z|\alpha)) = \sum_{t,c} \log(\alpha_t^{z_{t,c}}) = \sum_{t,c} z_{t,c} \log(\alpha_t)$$

(12)

The third term is

$$\log(P(Y|\beta)) = \sum_{t,m} Y_{t,m} \log \beta_{t,m} + (D^{Y_{t,m}} - Y_{t,m}) \log(1 - \beta_{t,m})$$

(13)

## 10 Q function

As  $z$  is unknown, we define  $\tilde{p}$  as the probability of  $z$ :

$$P(z_{t,c} = 1 | \alpha, \beta) =: \tilde{p}_{t,c}$$

Q is the expected value of the log-likelihood function.

At iteration  $i$ , the Q-function is:

$$\begin{aligned} Q_i = \mathbb{E}_{z|x, \alpha^i, \beta^i} (\log P(x, z, Y | \alpha, \beta)) = \\ \sum_{t,c} \tilde{p}_{t,c}^i \sum_m [x_{c,m} \log(\beta_{t,m}) + (1 - x_{c,m}) \log(1 - \beta_{t,m})] + \\ \sum_{t,c} \tilde{p}_{t,c}^i \log(\alpha_t) + \\ \sum_{t,m} Y_{t,m} \log \beta_{t,m} + (D^{Y_{t,m}} - Y_{t,m}) \log(1 - \beta_{t,m}) \end{aligned}$$

(14)

## 11 E-step

In the E-step we estimate the latent variable  $z$  and use it to define the Q function.

$$P(z_{t,c} = 1 | x_c, \beta, \alpha) = \frac{\alpha_t \prod_m \beta_{t,m}^{x_{m,c}} (1 - \beta_{t,m})^{1-x_{m,c}}}{\sum_k \alpha_k \prod_m \beta_{k,m}^{x_{m,c}} (1 - \beta_{k,m})^{1-x_{m,c}}} =: \tilde{p}_{t,c}$$

(15)

## 12 M-step

In the M-step we maximize the Q function, holding the estimate for the latent variable  $z$  constant and maximizing  $\alpha$ .

$$\alpha_t = \frac{\sum_c \tilde{p}_{t,c}}{C}$$

Next, we re-estimate the atlas:

$$\beta_{t,m} = \frac{Y_{t,m} + \sum_c \tilde{p}_{t,c} x_{c,m}}{D^{Y_{t,m}} + \sum_c \tilde{p}_{t,c}} \quad (16)$$

## The Epistate Model

At every marker region, reads are drawn from one of two possible epistates:  $\theta_{high}$  and  $\theta_{low}$ . Each epistate consists of a set of binomial distributions  $\theta = \{\theta_1, \theta_2, \dots, \theta_m\}$ , one per CpG site covered by the marker region.  $\theta_{high}$  is arbitrarily defined to be the epistate with higher mean methylation. Cell types differ by the probability of observing each epistate in each region.

## 13 Reference Atlas

The reference atlas consists of one matrix  $\lambda_{t,c}$ , with the probability of observing  $\theta_{high}$  under cell type  $t$  at read  $c$ . Within a genomic region  $\lambda$  does not vary between reads, leaving  $\lambda_t$ . Additionally, for every position we know  $\theta_{high,m}$  and  $\theta_{low,m}$  (see below). The overall probability of methylation per position is:

$$\beta_{t,m} = \lambda_t \theta_{high,m} + (1 - \lambda_t) \theta_{low,m}$$

## 14 Mixture

The mixture is one matrix  $X$ , with dimensions  $C$  reads over  $M$  CpG sites.

## 15 Likelihood

The observed data likelihood is:

$$P(x|\alpha, \theta_{high}, \theta_{low}, \lambda) = \prod_c \sum_t \alpha_t \left\{ \lambda_{t,c} \prod_m \left[ \theta_{high}^{x_{c,m}} (1 - \theta_{high})^{1-x_{c,m}} \right] + (1 - \lambda_{t,c}) \prod_m \left[ \theta_{low}^{x_{c,m}} (1 - \theta_{low})^{1-x_{c,m}} \right] \right\} \quad (17)$$

The observed data log-likelihood is:

$$\begin{aligned}
\log P(x|\alpha, \theta_{high}, \theta_{low}, \lambda) &= \sum_c \log \left( \sum_t \alpha_t \left\{ \lambda_{t,c} \prod_m \left[ \theta_{high}^{x_{c,m}} (1 - \theta_{high})^{1-x_{c,m}} \right] + \right. \right. \\
&\quad \left. \left. (1 - \lambda_{t,c}) \prod_m \left[ \theta_{low}^{x_{c,m}} (1 - \theta_{low})^{1-x_{c,m}} \right] \right\} \right) = \\
&\quad \sum_c \log \text{sumexp}_t \left\{ \log(\alpha_t) + \log(\lambda_{t,c}) \prod_m \left[ \theta_{high}^{x_{c,m}} (1 - \theta_{high})^{1-x_{c,m}} \right] + \right. \\
&\quad \left. (1 - \lambda_{t,c}) \prod_m \left[ \theta_{low}^{x_{c,m}} (1 - \theta_{low})^{1-x_{c,m}} \right] \right\} = \\
\sum_c \log \text{sumexp}_t \left\{ \log(\alpha_t) + \log \text{sumexp} \left\{ \log(\lambda_{t,c}) + \sum_m \left[ x_{c,m} \log(\theta_{high}) + (1 - x_{c,m}) \log(1 - \theta_{high}) \right], \right. \right. \\
&\quad \left. \left. \log(1 - \lambda_{t,c}) + \sum_m \left[ x_{c,m} \log(\theta_{low}) + (1 - x_{c,m}) \log(1 - \theta_{low}) \right] \right\} \right\} \\
(18)
\end{aligned}$$

$z$  is the indicator for  $\alpha$  and  $\mu$  is the indicator for  $\lambda$ . The complete data likelihood is:

$$\begin{aligned}
P(x, z, \mu | \alpha, \theta_{high}, \theta_{low}, \lambda) &= P(x | \mu, \theta_{high}, \theta_{low}) P(z | \alpha) P(\mu | z, \lambda) \\
(19)
\end{aligned}$$

The first term is

$$\begin{aligned}
\log(P(x | \mu, \theta_{high}, \theta_{low})) &= \log \left( \prod_c \prod_m \left[ \theta_{high,m}^{\mu_c x_{c,m}} (1 - \theta_{high,m})^{\mu_c (1-x_{c,m})} \right. \right. \\
&\quad \left. \left. \theta_{low,m}^{(1-\mu_c) x_{c,m}} (1 - \theta_{low,m})^{(1-\mu_c)(1-x_{c,m})} \right] \right) = \\
&\quad \sum_{c,m} \left[ \mu_c x_{c,m} \log(\theta_{high,m}) + \mu_c (1 - x_{c,m}) \log(1 - \theta_{high,m}) + \right. \\
&\quad \left. (1 - \mu_c) x_{c,m} \log(\theta_{low,m}) + (1 - \mu_c) (1 - x_{c,m}) \log(1 - \theta_{low,m}) \right] \\
(20)
\end{aligned}$$

The second term is

$$\log(P(z|\alpha)) = \sum_{t,c} \log(\alpha_t^{z_{t,c}}) = \sum_{t,c} z_{t,c} \log(\alpha_t) \quad (21)$$

The third term is

$$\begin{aligned} \log(P(\mu|z, \lambda)) &= \log\left(\prod_t \prod_c \lambda_{t,c}^{z_{t,c} \mu_c} (1 - \lambda_{t,c})^{z_{t,c}(1-\mu_c)}\right) = \\ &= \sum_{t,c} \left[ z_{t,c} \mu_c \log(\lambda_{t,c}) + z_{t,c}(1 - \mu_c) \log(1 - \lambda_{t,c}) \right] \end{aligned} \quad (22)$$

## 16 Q function

As  $z$  is unknown, we define  $\tilde{p}$  as the posterior probability of  $z$ :

$$P(z_{t,c} = 1 | \alpha, x) =: \tilde{p}_{t,c}$$

Similarly,

$$P(\mu_c = 1 | z, x) =: \tilde{q}_c$$

Note that  $\lambda$ ,  $\theta_{high}$ ,  $\theta_{low}$  and by extension  $\beta$  are always given and not re-estimated. For simplicity, we left them out of the conditional statements.

$Q$  is the expected value of the log-likelihood function.

At iteration  $i$ , the Q-function is:

$$\begin{aligned} Q_i &= \mathbb{E}_{z, \mu | x, \alpha^i, \lambda, \theta_{high}, \theta_{low}} (\log P(x, z, \mu | \alpha^i, \theta_{high}, \theta_{low}, \lambda)) = \\ &= \sum_{t,c} \left\{ \tilde{p}_{t,c} \tilde{q}_c \sum_m \left[ x_{c,m} \log(\theta_{high,m}) + (1 - x_{c,m}) \log(1 - \theta_{high,m}) \right] + \right. \\ &\quad \left. \tilde{p}_{t,c} (1 - \tilde{q}_c) \sum_m \left[ x_{c,m} \log(\theta_{low,m}) + (1 - x_{c,m}) \log(1 - \theta_{low,m}) \right] \right\} \\ &\quad + \sum_{t,c} \left\{ \tilde{p}_{t,c} \log(\alpha_t^i) \right\} + \\ &\quad + \sum_{t,c} \left\{ \tilde{p}_{t,c} \tilde{q}_c \log(\lambda_{t,c}) + \tilde{p}_{t,c} (1 - \tilde{q}_c) \log(1 - \lambda_{t,c}) \right\} \end{aligned} \quad (23)$$



## 17 E-step

In the E-step we estimate the latent variables  $z$  and  $\mu$  and use them to define the Q function.

$$\begin{aligned}
P(\mu_c = 1|x, \alpha) &= \sum_t P(z_{t,c} = 1|x, \alpha_t)P(\mu_c = 1|z_{t,c} = 1, x, \alpha) = \\
\sum_t \tilde{p}_{t,c}P(\mu_c = 1|z_{t,c} = 1, x) &\propto \sum_t \tilde{p}_{t,c}P(x|\mu_c = 1, z_{t,c} = 1)P(\mu_c = 1|z_{t,c} = 1) = \\
\sum_t \tilde{p}_{t,c}P(x|\mu_c = 1)P(\mu_c = 1|z_{t,c} = 1) &= \sum_t \tilde{p}_{t,c}\lambda_t P(x|\mu_c = 1) = \\
&= \sum_t \tilde{p}_{t,c}\lambda_t \prod_m \theta_{high}^{x_{c,m}}(1 - \theta_{high})^{1-x_{c,m}}
\end{aligned} \tag{24}$$

Since  $\mu$  can only take on two values, we constrain

$$P(\mu_c = 1|x, \tilde{p}) + P(\mu_c = 0|x, \tilde{p}) = 1$$

As above:

$$P(\mu_c = 0|x, \tilde{p}) = \sum_t \tilde{p}_{t,c}(1 - \lambda_t) \prod_m \theta_{low}^{x_{c,m}}(1 - \theta_{low})^{1-x_{c,m}}$$

Finally:

$$P(\mu_c = 1|x, \alpha) = \frac{\sum_t \tilde{p}_{t,c}\lambda_t \prod_m \theta_{high}^{x_{c,m}}(1 - \theta_{high})^{1-x_{c,m}}}{\sum_t \tilde{p}_{t,c}\lambda_t \prod_m \theta_{high}^{x_{c,m}}(1 - \theta_{high})^{1-x_{c,m}} + \sum_t \tilde{p}_{t,c}(1 - \lambda_t) \prod_m \theta_{low}^{x_{c,m}}(1 - \theta_{low})^{1-x_{c,m}}} \tag{25}$$

We do the same for  $z$ :

$$\begin{aligned}
P(z_{t,c} = 1|x, \alpha_t) &\propto P(x|z_{t,c} = 1, \alpha_t)P(z_{t,c} = 1|\alpha_t) = \left[ \lambda_{t,c}P(x|\mu_c = 1) + (1 - \lambda_{t,c})P(x|\mu_c = 0) \right] \alpha_t \\
&= \alpha_t \lambda_{t,c} \prod_m \left[ \theta_{high}^{x_{c,m}}(1 - \theta_{high})^{1-x_{c,m}} \right] + \alpha_t (1 - \lambda_{t,c}) \prod_m \left[ \theta_{low}^{x_{c,m}}(1 - \theta_{low})^{1-x_{c,m}} \right]
\end{aligned} \tag{26}$$

Then normalize so that every read comes from a cell type.

## 18 M-step

In the M-step we maximize the Q function, holding the estimate for the latent variables constant and maximizing  $\alpha$ . The only term in the Q function with  $\alpha$  is identical to CelFiE and CelFiE+, so the maximization step is the same.

$$\alpha_t = \frac{\sum_c \tilde{p}_{t,c}}{C}$$

## Estimating Epistates in the Reference Atlas

For each marker region in the Epistate reference, we estimate  $\Theta_{high}$ ,  $\Theta_{low}$  and  $\lambda_t$ . First, we jointly examine all reads from the entire reference dataset. We assume each read is associated with either  $\Theta_{high}$  or  $\Theta_{low}$ .  $v_j$  is the prior probability for epistate  $j \in [1, 2]$ . At the expectation step, we update the posterior probability of each read  $P_{j,c}$  given  $\Theta$ . At the maximization step, we estimate the hidden state  $\Theta$ , and  $v_j$ .

### 19 Likelihood

The observed data likelihood is:

$$P(x|\Theta_{high}, \Theta_{low}, v) = \prod_c \sum_{j=1}^2 v_j \left[ \prod_m \theta_j^{x_{c,m}} (1 - \theta_j)^{1-x_{c,m}} \right]$$

### Expectation

$$P_{j,c} = \frac{v_j \prod_m \theta_{m,j}^{x_{c,m}} (1 - \theta_{k,j})^{1-x_{c,m}}}{\sum_{j=1}^2 v_j \prod_m \theta_{m,j}^{x_{c,m}} (1 - \theta_{k,j})^{1-x_{c,m}}}$$

### Maximization

$$\theta_{m1} = \frac{pseudocount + \sum_c P_{1,c} x_{c,m}}{2 * pseudocount + \sum_c P_{1,c}}$$

$$v_1 = \frac{pseudocount + \sum_c P_{1,c}}{2 * pseudocount + C}$$

Then, we split the reference by cell type. For each cell type,  $\lambda$  if the probability of observing  $\Theta_{high}$ . For each subset:

$$\lambda_t = \frac{\sum_c P_{1,c}}{C}$$

### Worst possible RMSE

Let  $Y = [Y_1, Y_2, \dots, Y_n]$  be a vector of true cell type fractions in a mixture, ordered from smallest to largest  $Y_1 \leq Y_2 \leq \dots \leq Y_n$  and  $\hat{Y} = [\hat{Y}_1, \hat{Y}_2, \dots, \hat{Y}_n]$  be the estimated values. The RMSE is defined as

$$\sqrt{\frac{1}{n} \sum_{i=1}^n (\hat{Y}_i - Y_i)^2}$$

As these are fractions we can add the constraint that  $\sum_{i=1}^n Y_i = 1$  and  $0 \leq Y_i \leq 1$  for all  $i$ . This is also true for the estimates:  $\sum_{i=1}^n \hat{Y}_i = 1$  and  $0 \leq \hat{Y}_i \leq 1$  for all  $i$ .

For the worst-case estimation, i.e. the largest RMSE, let  $\hat{Y}_1 = 1$  and  $\hat{Y}_i = 0$  for  $i \neq 1$ . The squared error terms are then  $(1 - Y_1)^2$  for  $i = 1$  and  $Y_i^2$  for  $i \neq 1$ .

To prove this results in the maximum RMSE, consider any other estimate  $\hat{Y}'$ . This implies, for some  $j \neq 1$ ,  $\hat{Y}'_j > 0$ .

The squared error term would then be  $(1 - Y_1 - \hat{Y}'_j)^2$  for  $i = 1$ ,  $(\hat{Y}'_j - Y_j)^2$  for  $i = j$ , and  $Y_i^2$  for  $i \neq 1, j$ . Since  $\hat{Y}'_j$  is non-negative and  $\leq 1$ ,  $(1 - Y_1 - \hat{Y}'_j)^2 < (1 - Y_1)^2$  and  $(\hat{Y}'_j - Y_j)^2 < Y_j^2$ .

The entire expression is therefore smaller than the worst-case estimation. Intuitively, since  $Y_1$  is the smallest, its error term has the largest impact on increasing the RMSE when estimated far from its true value. Thus, any other estimation would result in a lower RMSE.

## WGBS Data Processing

In order to convert BAM files to the Biscuit epi-read format, we first generated a SNP file from the VCF files requiring  $GQ \geq 15$  for positions overlapping a dbSNP common allele, and requiring  $GQ \geq 60$  for all other positions. DbSNP common allele table was downloaded from UCSC for the hg19 assembly, and was processed with:

`https://github.com/ekushele/methylseq/blob/master/bin/processUcscDbsnp.pl`

From the processed file, we included only 'snv' records. The formatted-snv file was zipped and indexed with the `tabix -s 1 -b 2 -e 3` command. This file was passed to `bcftools annotate (v1.9)` to annotate the header of VCF files: `bcftools annotate WHITELIST -0 z -a {COMMON_DBSNP_FILE} -h common_dbsnp.hdr -c CHROM, FROM, TO, TYPE, COMMON_SOME, COMMON_ALL, REF_MIN, ALT_MIN, REF_DBSNP, ALT_DBSNP, REF_ALL, ALT_ALL, RSID, MAX_MAF {VCF_FILE}`.

(`common_dbsnp.hdr` can be found at:

`https://github.com/ekushele/methylseq/blob/master/assets/common\_dbsnp.hdr`).

The redhead file was indexed with `tabix -p vcf`. From the re-headed files, we included variants with  $GQ \geq 60$  for heterozygous variants for positions not overlapping the `COMMON_DBSNP_FILE` with `bcftools view -0 z -i 'ALT!="N" & ALT!="." & ((COUNT(GT=="0/1") >= 1 & COMMON_ALL == 1 & MAX_MAF >= 0.05) | (COUNT(GT=="0/1" & GQ >= 60) >= 1))' {REHEAD_VCF} > {DBSNP_HET60}`.

{`DBSNP_HET60`} was indexed with `tabix -p vcf`. For all other variants, we excluded variants below 10 and parsed the file to be in bed format with the following command:

`bcftools query -u -i 'GT="0/1" & GQ >= 10' --format'`

```
%CHROM%POS%POS%REF%ALT[%GT%GQ%SP%AC%AF1]%RSID%  
COMMON_ALL%MAX_MAF%REF_MIN%ALT_MIN'{DBSNP_HET60}|  
awk -vOFS = "nt"'{$2 = $2 - 1; print}' > {SNP_FILE}.
```

Then, blacklist regions were excluded from BAM files with the command `bedtools intersect(v2.29.1)` using the BAM and a whitelist as input files, and additional command line arguments `'-ubam -f 1.0'`.

Epiread files were produced with the `biscuit epiread` command for whitelist-BAM files where a SNP file was given as input to the `-B SNP_FILE`. The epiread files were sorted by names using the command `'-k2,2 -k1,1 -k4,4 -k3,3n'`, and they were converted to a bed-like format, merging paired-end epiread records together using the script available at [https://github.com/ekushele/methylseq/blob/master/bin/epiread\\_pairedEnd\\_conversion](https://github.com/ekushele/methylseq/blob/master/bin/epiread_pairedEnd_conversion) in debug mode.

The CpG file was downloaded from the Biscuit QC assets release page:

<https://github.com/huishenlab/biscuit/releases>

These merged files were sorted by position using the command `sort -k1,1Vf -k 2,2n -k 3,3n` and then tabixed using the `'tabix -0 -p bed'` command. The original epireads (before merging) were sorted with `sort -k1,1Vf -k5,5V` and tabixed with `tabix -0 -s 1 -b 5 -e 5`.
